# Supplementary material for: MGMT Gene Silencing and Benefit from Temozolomide in Glioblastoma
Source: Atypon-hosted journal article supplement (doi:10.1056/nejmoa043331), 2005-03-09
Supplement: 997sa1.pdf [file 997sa1.pdf]

## Supplementary Appendix

This appendix has been provided by the authors to give readers additional information about their work.

Supplement to: Hegi ME, Diserens A-C, Gorlia T, et al. *MGMT* gene silencing and benefit from temozolomide in glioblastoma. *N Engl J Med* 2005;352:997-1003.

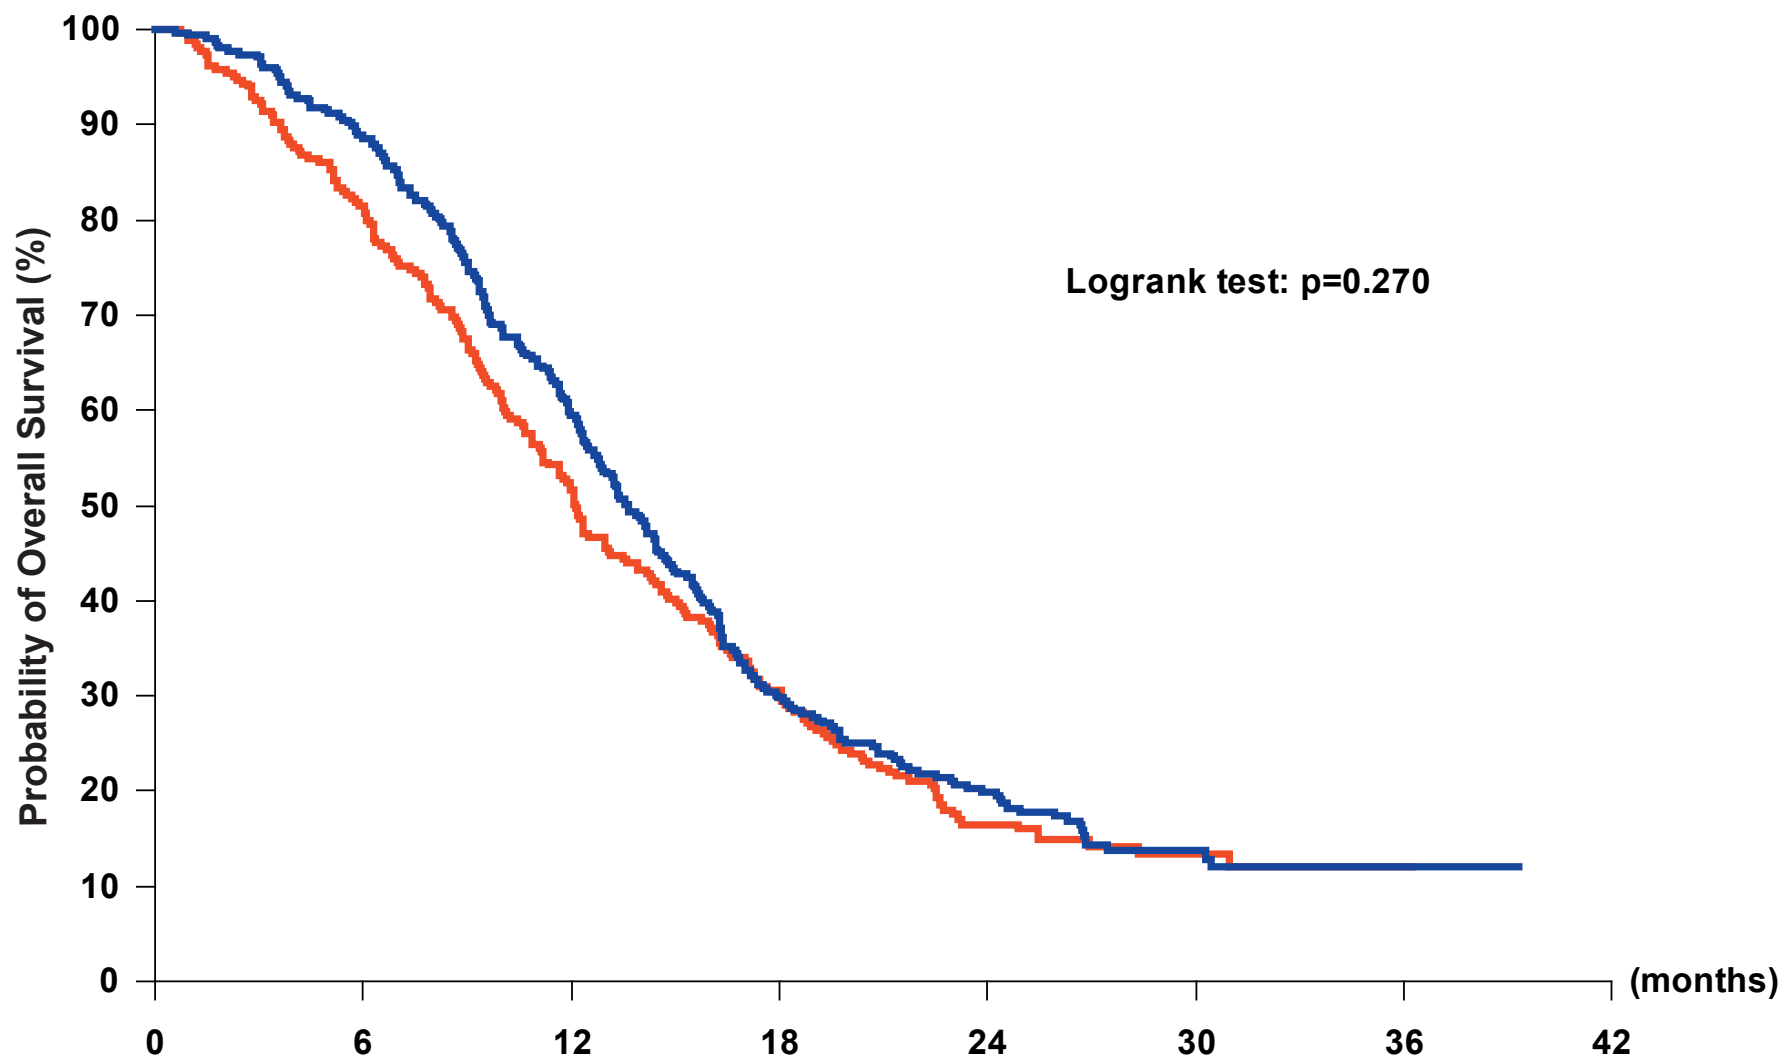

| O   | N   | Number of patients at risk : |     |    |    |    |   |                 |
|-----|-----|------------------------------|-----|----|----|----|---|-----------------|
| 223 | 266 | 215                          | 136 | 79 | 31 | 12 | 1 | — Not performed |
| 257 | 307 | 271                          | 182 | 89 | 49 | 17 | 3 | — Performed     |

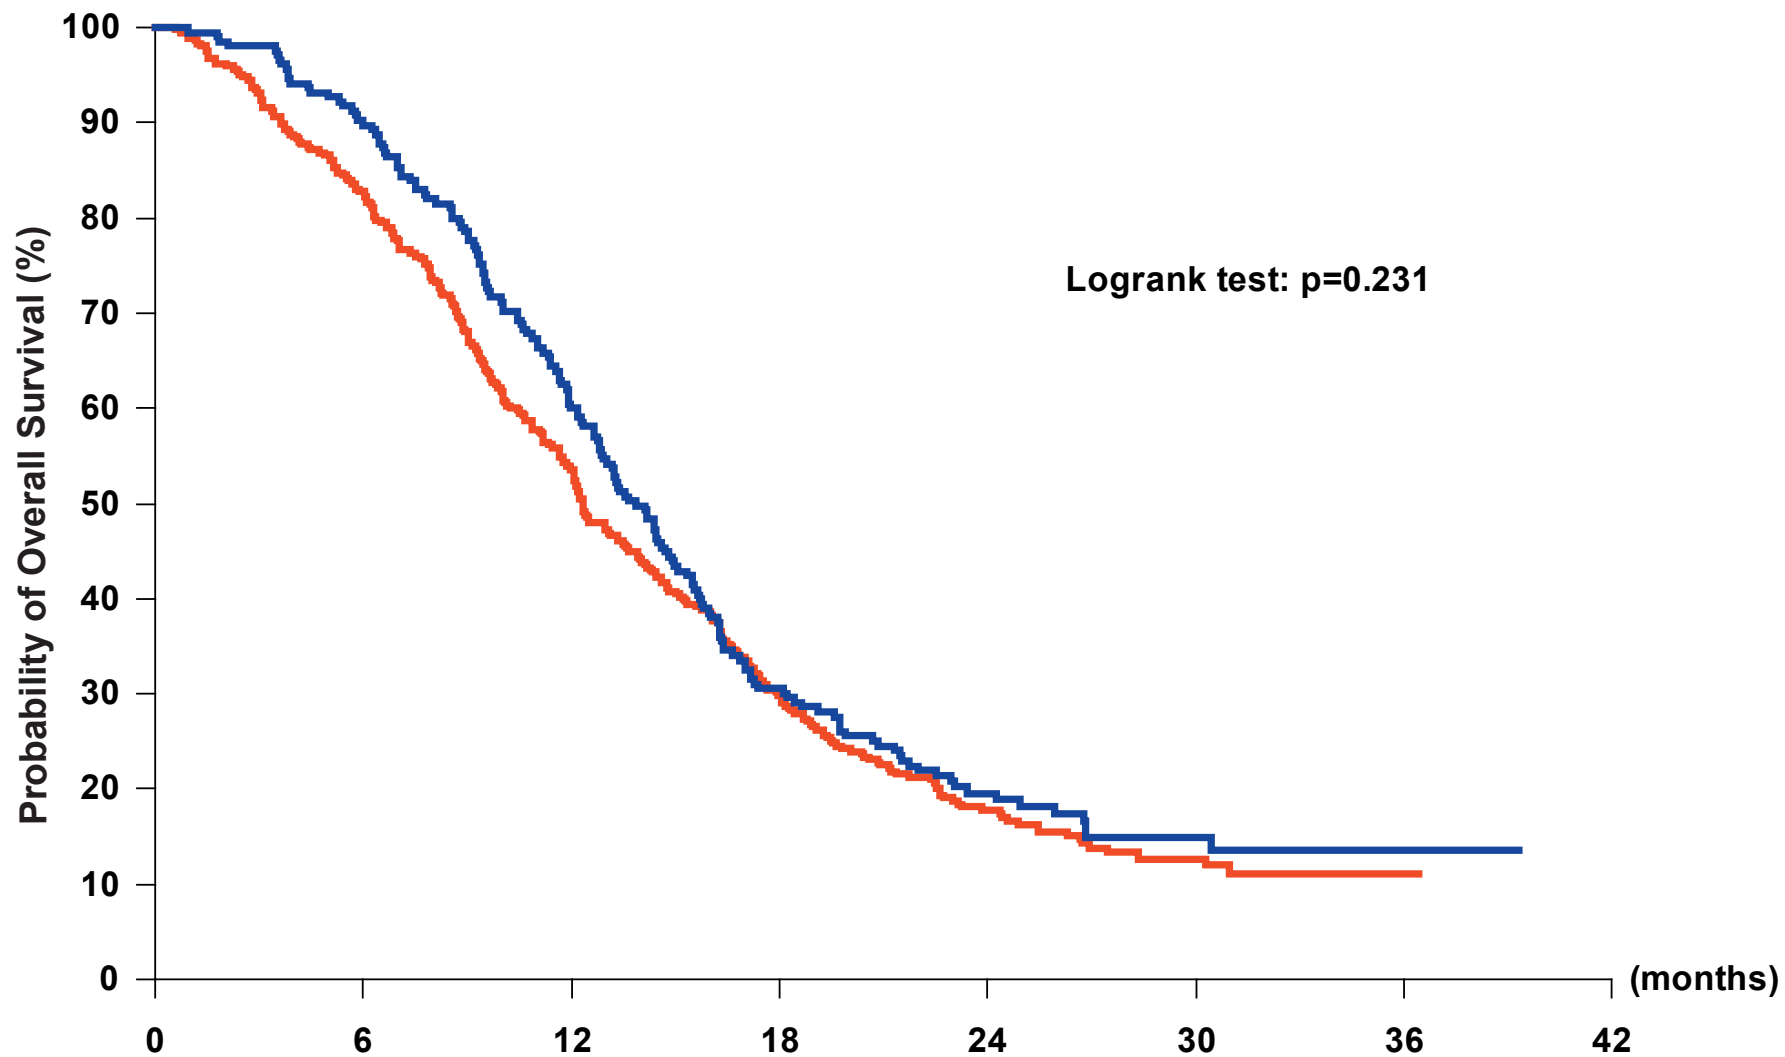

| O   | N   | Number of patients at risk : |     |     |    |    |   |                |  |
|-----|-----|------------------------------|-----|-----|----|----|---|----------------|--|
| 310 | 367 | 302                          | 195 | 106 | 49 | 18 | 2 | — Unsucessfull |  |
| 170 | 206 | 184                          | 123 | 62  | 31 | 11 | 2 | — Sucessfull   |  |

## Legend for Supplementary Figure

Supplementary Figure 1. **Survival characteristics of patients for whom the *MGMT***

**methylation status was assessed.** The patients for whom the *MGMT* promoter

methylation status was determined is representative of the whole study population.

Overall survival was not different whether or not the MSP-test was performed **(A)**.

Likewise, patients had similar overall survival whether or not the test was interpretable

**(B)**.
